# Supplementary material
Source: HighWire-hosted journal article supplement (https://bmjopen.bmj.com/content/13/11/e079507)
Supplement: inline-supplementary-material-2 [file inline-supplementary-material-2.pdf]

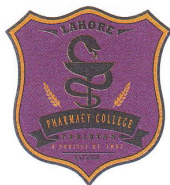

# LAHORE PHARMACY COLLEGE

(A PROJECT OF LMDC)  
Affiliated with  
UNIVERSITY OF HEALTH SCIENCES, LAHORE

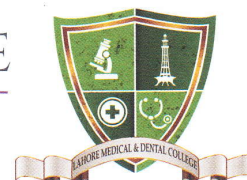

Ref. No. LPC / ETH/26/09/22

Date: 23-09-2022

**Dr. Naeem Mubarak,**  
Department of Pharmacy Practice,  
Lahore Pharmacy College,  
(A Project of LMDC).

**SUBJECT: ETHICAL APPROVAL CERTIFICATE**

Dear Dr. Naeem Mubarak,

Apropos of the ethical review application (ref: NM/03//22), after a detailed review of the ethical aspects of the research project mentioned below, the Research Ethics Committee of Lahore Pharmacy College grants ethical approval for the implementation of the study.

- **Research Title:** "Evaluating competencies of Community Pharmacists when supplying opioids. A cross sectional study in Punjab, Pakistan".
- **Principal Supervisor:** Dr. Naeem Mubarak
- **Co-Supervisors:** Prof. Dr. Nasira Saif ur Rehman

This ethical approval certificate is valid from **23<sup>rd</sup> Sep. 2022** to **23<sup>rd</sup> Sep. 2023**.

Yours Truly,

**Dr. Asad Majeed Khan (PhD)**  
Chairperson,  
Research Ethics Committee,  
Lahore Pharmacy College,  
University of Health Sciences,  
Lahore, Pakistan.  
[asad.majeed@lmdc.edu.pk](mailto:asad.majeed@lmdc.edu.pk)

Tulspura, North Canal Bank, Lahore 53400, Pakistan | Tel: +92 346 4418891-98  
Fax: +92 42 37392220 | E-mail: [laphco@gmail.com](mailto:laphco@gmail.com) | [www.lmdc.edu.pk](http://www.lmdc.edu.pk)
