# Supplementary material
Source: HighWire-hosted journal article supplement (https://bmjopen.bmj.com/content/13/11/e079507)
Supplement: inline-supplementary-material-3 [file inline-supplementary-material-3.pdf]

## "Are Pharmacists on the Frontlines of the Opioid Epidemic? A Cross Sectional Study of the Practices and Competencies of Community and Hospital Pharmacists in Punjab, Pakistan"

Naeem Mubarak,<sup>1</sup> Taheer Zahid,<sup>2</sup> Fatima Rahman Rana,<sup>1</sup> Umm-E-Barirah Ijaz,<sup>1</sup> Afshan Shabbir,<sup>1</sup> Mahrukh Manzoor,<sup>1</sup> Nahan Khan,<sup>1</sup> Minahil Arif,<sup>1</sup> Muhammad Mehroz Naeem,<sup>1</sup> Sabba Kanwal,<sup>1</sup> Nasira Saif-ur-Rehman,<sup>3</sup> Che Suraya Zin,<sup>4</sup> Khalid Mahmood,<sup>5</sup> Javaid Asgher,<sup>1,6,7</sup> Mohamed Hassan Elnaem<sup>8\*</sup>

<sup>1</sup> Department of Pharmacy Practice, Faculty of Pharmaceutical Sciences, Lahore University of Biological & Applied Sciences, Lahore, Punjab, Pakistan.

<sup>2</sup> Manager, Servaid Pharmacy, 24-M Quaid-e-Azam Industrial Estate, Lahore, Punjab, Pakistan.

<sup>3</sup> Department of Pharmaceutics, Faculty of Pharmaceutical Sciences, Lahore University of Biological & Applied Sciences, Lahore, Punjab, Pakistan.

<sup>4</sup> Kuliyah of Pharmacy, International Islamic University, Kuantan, Malaysia.

<sup>5</sup> Institute of Information Management, University of the Punjab, Lahore, Punjab, Pakistan.

<sup>6</sup> Lahore Medical & Dental College, Lahore, Punjab, Pakistan.

<sup>7</sup> Doctors Hospital & Medical Centre, Lahore, Punjab, Pakistan.

<sup>8</sup> School of Pharmacy and Pharmaceutical Sciences, Ulster University, Coleraine, United Kingdom.

### Corresponding author:

Dr Mohamed Hassan Elnaem,

School of Pharmacy and Pharmaceutical Sciences, Ulster University, Coleraine, United Kingdom.

Email: [m.elnaem@ulster.ac.uk](mailto:m.elnaem@ulster.ac.uk)

ORCID: [0000-0003-0873-6541](https://orcid.org/0000-0003-0873-6541)

DEMOGRAPHICS

Please ENCIRCLE/WRITE

- Gender: Male Female
- Age (years) \_\_\_\_\_ Years of practice experience \_\_\_\_\_
- Employment status: Full-time Part-time Intern
- Type of community pharmacy: Chain Independent Hospital
- If pharmacy in hospital, type of hospital: Public Private
- Highest level of education: PhD Masters Pharm-D/B-Pharm
- Location of pharmacy:
  - Lahore, Kasur, Nankana Sahib, Sheikhupura
  - Gujranwala, Gujrat, Hafizabad, MandiBahauddin,
  - Narowal, Sialkot
  - Sargodha, Khushab, Mianwali, Bhakkar
  - Sahiwal, Pakpattan, Okara
  - Multan, Lodhran, Khanewal, Vehari
  - Faisalabad, Chiniot, Toba Tek Singh, Jhang
  - Rawalpindi, Jhelum, Chakwal, Attock
  - Bahawalpur, Bahawalnagar, Rahim Yar Khan
  - DG Khan, Layyah, Muzaffargarh, Rajanpur
- Please encircle the appropriate:  
[Never = 1, rarely= 2, Sometimes= 3, Very often= 4, Almost always =5]
  - I.....make clinical notes in a journal/dispensing software (apart from narcotic register) to monitor ongoing opioids use.  
1 2 3 4 5
  - I .....counsel patients on the possible side effects of opioids.  
1 2 3 4 5
  - I .....counsel patients on opioids over dose risk.  
1 2 3 4 5
  - I .....refuse the supply of the opioids when in doubt of abuse  
1 2 3 4 5
  - I.....notify police/regulatory bodies on the abuse of opioids  
1 2 3 4 5
  - To clarify the opioids' prescription, I .....call the physician
- [Never = 1, rarely= 2, Sometimes= 3 Very often= 4 Almost always =5]
  - Have you completed any continuous professional development course in last ONE year? YES NO
  - You completed your B.Pharm/Pharm-D degree from a .....institute  
Public Private
  - Your system of education in B.Pharm/Pharm-D was:  
Annual Semester

OPIOIDS AND SOCIETY

- The “Opioid Epidemic” or “Opioid Crises” refers to the increase in the number of deaths and hospitalization:
  - a. Due to prescription opioid use
  - b. Due to illicit(illegal) opioid use
  - c. Due to opioid use for instant pain relief
  - d. Due to both prescription and illicit( illegal) opioid use
  - e. I don’t know
- National Institute on Drug Abuse recommends the term \_\_\_\_\_ for a “substance or drug abuser”
  - a. Drug addict
  - b. Patient
  - c. Junkie
  - d. Addicted baby
  - e. I don’t know
- In Pakistan, the highest number of opioid drug users belongs to:
  - a. KPK
  - b. Punjab
  - c. Balochistan
  - d. Sindh
  - e. I don’t know
- In Pakistan, opioid misuse is more common among
  - a. Males
  - b. Females
  - c. Transgender
  - d. No difference on the basis of gender
  - e. I don’t know
- In Pakistan, generally women abuse sedative and amphetamines, while, men favor \_\_\_\_\_
  - a. Methamphetamine and cannabis
  - b. Cannabis and alcohol
  - c. Sedative and opioids
  - d. Cannabis and opioids
  - e. I don’t know

### OPIOID PHYSIOLOGY

- 1 **Opioids produce analgesia, which indicates:**
  - a. CNS depression
  - b. CNS stimulation
  - c. Both depression and stimulation
  - d. No effect
  - e. I don't know
- 2 **The increase in the sensitivity of pain receptors is called:**
  - a. Analgesia
  - b. Algesia
  - c. Hyperalgesia
  - d. Allodynia
  - e. I don't know
- 3 **Beta endorphins are the most common endogenous ligands for the receptor:**
  - a. Beta
  - b. Delta
  - c. Kappa
  - d. Mu
  - e. I don't know
- 4 **When activated, which one of the following opioid receptors mainly cause both analgesia and dysphoria?**
  - a. Mu
  - b. Kappa
  - c. Delta
  - d. Alpha
  - e. I don't know
- 5 **When activated, which one of the following opioid receptors causes the most respiratory depression?**
  - a. Mu
  - b. Beta
  - c. Kappa
  - d. Delta
  - e. I don't know

### OPIOID PHARMACOLOGY

- 1 **The difference between Opiates and Opioids is**
  - a. Opiates are natural, while Opioids are synthetic
  - b. Opioids are natural, while Opiates are synthetic
  - c. Opiates are semi-synthetic, while Opioids are synthetic
  - d. Opioids are semi-synthetic, while Opiates are synthetic
  - e. I don't know
- 2 **Majority of the opioid receptors belongs to:**
  - a. Intracellular receptors
  - b. Tyrosine Kinase receptors
  - c. G-protein coupled receptors
  - d. Enzyme linked receptors
  - e. I don't know
- 3 **Tramadol is a \_\_\_\_\_ Mu receptor agonist**
  - a. Strong
  - b. Weak
  - c. Moderate
  - d. None of these
  - e. I don't know
- 4 **At the injection site, Morphine causes localized pain and itching due to the release of:**
  - a. Glutamine
  - b. Serotonin
  - c. Dopamine
  - d. Histamine
  - e. I don't know
- 5 **Which one of the following opioids is a mixed agonist-antagonist?**
  - a. Morphine
  - b. Fentanyl
  - c. Codeine
  - d. Pentazocine
  - e. I don't know

### OPIOID PHARMACOKINETICS AND DRUG INTERACTIONS

- 1 **Morphine undergoes \_\_\_\_\_ during phase-2 biotransformation**
  - a. Methylation
  - b. Acetylation
  - c. Glucuronidation
  - d. Oxidation
  - e. I don't know
- 2 **Which one of the following opioids is safe to use in renal failure and does not require dose adjustment?**
  - a. Buprenorphine
  - b. Morphine
  - c. Fentanyl
  - d. Methadone
  - e. I don't know
- 3 **Which one of the following opioids has the least CNS penetration?**
  - a. Morphine
  - b. Loperamide
  - c. Codeine
  - d. Fentanyl
  - e. I don't know
- 4 **Opioids can cause significant respiratory depression when administered with:**
  - a. Naloxone
  - b. Naltrexone
  - c. Anti-hypertensive
  - d. Benzodiazepines
  - e. I don't know
- 5 **Which of the following drugs when administered with tramadol can cause serotonin syndrome (increase in serotonin levels)?**
  - a. Tricyclic anti-depressants
  - b. Selective serotonin reuptake inhibitors
  - c. Both
  - d. None of these
  - e. I don't know

### THERAPEUTIC USE OF OPIOIDS

- 1 **The appropriate treatment for moderate pain as defined by WHO analgesic ladder is:**
  - a. NSAIDS
  - b. Strong opioids and NSAIDS
  - c. Weak opioids and NSAIDS
  - d. Weak opioids and strong opioids
  - e. I don't know
- 2 **Which of the following opioids are used for opioid substitution therapy?**
  - a. Meperidine and Methadone
  - b. Oxycodone and Buprenorphine
  - c. Fentanyl and Methadone
  - d. Methadone and Buprenorphine
  - e. I don't know
- 3 **Opioid dependence refers to:**
  - a. Withdrawal symptoms when not taking the opioid
  - b. Reduced response to an opioid with repeated use
  - c. Persistent use of an opioid despite substantial harm and adverse consequences
  - d. Overwhelming desire to continue taking the opioid and obtaining it by all means
  - e. I don't know
- 4 **Which one of the following opioids is generally contraindicated in Myocardial Infarction?**
  - a. Morphine
  - b. Fentanyl
  - c. Methadone
  - d. Pentazocine
  - e. I don't know
- 5 **Opioid dependence during pregnancy can be treated with:**
  - a. Methadone
  - b. Fentanyl
  - c. Naloxone
  - d. Morphine
  - e. I don't know

### OPIOID EDUCATION

- 1 **Pharmacist should educate the patient to change the fentanyl patch after:**
  - a. 72 hours
  - b. 48 hours
  - c. 24 hours
  - d. 6 hours
  - e. I don't know
- 2 **The appropriate fate of fentanyl patch after use is:**
  - a. Reuse the same patch
  - b. Incinerate(fire) the patch
  - c. Flush over (used or leftover patches)
  - d. Give to someone else for use to prevent drug wastage
  - e. I don't know
- 3 **Pharmacist should advise the patient to store opioids at:**
  - a. Room temperature
  - b. Refrigerator
  - c. Freezer
  - d. Any temperature
  - e. I don't know
- 4 **Pharmacist should restrict methadone supply for:**
  - a. 7 days
  - b. 8 days
  - c. 6 days
  - d. 10 days
  - e. I don't know
- 5 **In case of incorrect, ambiguous or incomplete prescription of opioids, pharmacist should:**
  - a. Dispense medication as written
  - b. Correct the prescription and dispense the medication
  - c. Call to police
  - d. Hold dispensing and clarify from the prescriber
  - e. I don't know

### OPIOID DISPENSING

- 1 **In Pakistan, as per Control of Narcotic Substances Act 1967, opioids come under:**
  - a. Schedule A
  - b. Schedule B
  - c. Schedule C
  - d. Schedule D
  - e. I don't know
- 2 **Which one of the following is NOT the sign of opioid's intoxication?**
  - a. Altered mental state
  - b. Shallow breathing
  - c. Irresponsiveness
  - d. Fast breathing
  - e. I don't know
- 3 **Pharmacist should dispense the take home doses of opioids in:**
  - a. Child resistant containers
  - b. Amber colored bottles
  - c. Light colored containers
  - d. Aluminum foil
  - e. I don't know
- 4 **The record for the sale of opioids should be documented in the narcotic register with:**
  - a. blue ink
  - b. red ink
  - c. green ink
  - d. any color
  - e. I don't know
- 5 **As per Punjab Drug Rules-2007, which one of the following is an important particular to mention in the narcotic register during the sale of opioids?**
  - a. Lot number
  - b. Expiry date
  - c. Manufacturing date
  - d. Batch number
  - e. I don't know

## OPIOIDS AND PAIN MANAGEMENT

- 1 **...is the pain due to injury to nerve and opioid of choice for this kind of pain is.....**
  - a. Neuropathic, Methadone
  - b. Psychogenic, Morphine
  - c. Somatic, Methadone
  - d. Visceral, Morphine
  - e. I don't know
- 2 **Which one of the following opioids is the gold standard for the treatment of acute (severe, accidental) pain?**
  - a. Methadone
  - b. Fentanyl
  - c. Morphine
  - d. Tramadol
  - e. I don't know
- 3 **Which one of the following is the opioid of choice in labor pain?**
  - a. Meperidine
  - b. Pentazocine
  - c. Methadone
  - d. Buprenorphine
  - e. I don't know
- 4 **The Centers for Disease Control and Prevention recommends the use of opioid therapy in patients with acute (severe) pain for:**
  - a. 7-14 days
  - b. 3-7 days
  - c. 14-28 days
  - d. More than 1 month
  - e. I don't know
- 5 **FDA approved opioid for treatment of acute pain in children is:**
  - a. Morphine
  - b. Codeine
  - c. Fentanyl
  - d. Methadone
  - e. I don't know

## COURSE OF OPIOID THERAPY

- 1 **Opioid taper, Opioid rotation, and Opioid Equianalgesic table refer to \_\_\_\_\_, respectively:**
  - a. Dose reduction over time, switching between opioids, equivalent to analgesic dose of morphine
  - b. Switching between opioids, dose reduction over time, equivalent to analgesic dose of codeine
  - c. Dose reduction over time, switching from opioids to non-opioids, equivalent to analgesic dose of morphine
  - d. Dose reduction over time, switching between opioids, equivalent to analgesic dose of methadone
  - e. I don't know
- 2 **The appropriate adult dose of Tramadol is:**
  - a. 50-100mg for 4-6 hours PRN, with maximum dose up to 400mg/day
  - b. 200-300mg for 4-6 hours PRN, with maximum dose up to 500mg/day
  - c. 50-100mg for 4-6 hours PRN, with maximum dose up to 500mg/day
  - d. 200-300mg for 4-6 hours PRN, with maximum dose up to 400mg/day
  - e. I don't know
- 3 **As per equianalgesic table, \_\_\_\_\_ oral dose of tramadol is equivalent to 10mg of morphine**
  - a. 100mg
  - b. 50mg
  - c. 200mg
  - d. 150mg
  - e. I don't know
- 4 **The indications for an opioid rotation are to:**
  - a. Improve analgesia
  - b. Reduce adverse effects
  - c. Decrease opioid tolerance
  - d. All of the above
  - e. I don't know
- 5 **CDC guidelines recommend appropriate opioid tapering as the**
  - a. 10% decrease in dose per month
  - b. 20% decrease in dose per month
  - c. 30% decrease in dose per month
  - d. 40% decrease in dose per month
  - e. I don't know

### OPIOID MONITORING

- 1 **5A's of monitoring chronic pain are:**
  - a. Activity, analgesia, adverse effects, aberrant behaviors, affect
  - b. Activity, algesia, adverse effects, aberrant behaviors, assign
  - c. Activity, algesia, adverse effects, adherent behaviors, affect
  - d. Action, analgesia, adverse effects, aberrant behaviors, assign
  - e. I don't know
- 2 **The bolus injection of morphine requires monitoring of respiratory rate after every:**
  - a. 12 hours
  - b. 6 hours
  - c. 3 hours
  - d. 24 hours
  - e. I don't know
- 3 **Opioid therapy monitoring is recommended .....for patients at low risk of adverse effects:**
  - a. Once every 3-6 months
  - b. Twice every 3-6 months
  - c. Monthly
  - d. Weekly
  - e. I don't know
- 4 **Opioid therapy monitoring is recommended .....for patients at high risk of adverse effects:**
  - a. Once every 3-6 months
  - b. Twice every 3-6 months
  - c. Monthly
  - d. Weekly
  - e. I don't know
- 5 **Chronic opioid therapy is the use of opioids daily or nearly daily for at least:**
  - a. 30 days
  - b. 90 days
  - c. 60 days
  - d. 180 days
  - e. I don't know

### OPIOID OVERDOSE TRAINING

- 1 **The maximum toxic dose of morphine in adult patients is:**
  - a. 250mg/day
  - b. 500mg/day
  - c. 1000mg/day
  - d. 100mg/day
  - e. I don't know
- 2 **The usual dose of Naloxone for opioid toxicity is:**
  - a. 0.4mg to 2mg IV at 2-3 min intervals
  - b. 10 mg IV at 2-3 min intervals
  - c. 2.5mg to 5mg at 2-3 min intervals
  - d. 7.5 mg IV at 2-3 min intervals
  - e. I don't know
- 3 **The FDA recommends administering IM Naloxone in the**
  - a. Upper arm
  - b. Buttock
  - c. Veins
  - d. Intrathecal
  - e. I don't know
- 4 **Three key symptoms of opioid overdose triad include:**
  - a. Pinpoint pupils, Slow breathing, Unconsciousness/non-responsiveness
  - b. Dilated pupils, Shallow breathing, Unconsciousness/non-responsiveness
  - c. Pinpoint pupils, Fast breathing, Clammy skin
  - d. Dilated pupils, Slow breathing, Limp body (difficulty in walk)
  - e. I don't know
- 5 **Which one of the following opioids is resistant to Naloxone?**
  - a. Buprenorphine
  - b. Morphine
  - c. Codeine
  - d. Hydromorphone
  - e. I don't know
